# Supplementary material
Source: PubMed Central journal article supplement (PMC5482284)
Supplement: NIHMS863896-supplement-1.pdf [file NIHMS863896-supplement-1.pdf]

# **Convergent evolution of a modified, acetate-dependent TCA cycle in bacteria**

Waldan K. Kwong, Hao Zheng, and Nancy A. Moran

Correspondence to: [wk.kwong@aya.yale.edu](mailto:wk.kwong@aya.yale.edu)

## **This document includes:**

Supplementary Figures 1–3

Supplementary Tables 1 & 2

**Supplementary Figure 1.** Growth effects of ASCT-complementation in different *E. coli* mutant backgrounds. Strains with both ASCT and SCS had slowest growth, suggesting competitive inhibition. Strains with  $\Delta sucC$  backgrounds had fastest growth, but at the cost of achieving lower final densities. Strains were grown in M9 minimal media supplemented with 0.3% w/v sodium acetate and 75 mg/ml carbenicillin for plasmid maintenance. OD<sub>600</sub> readings were taken hourly. Lines represent replicates (n = 3 for each strain).

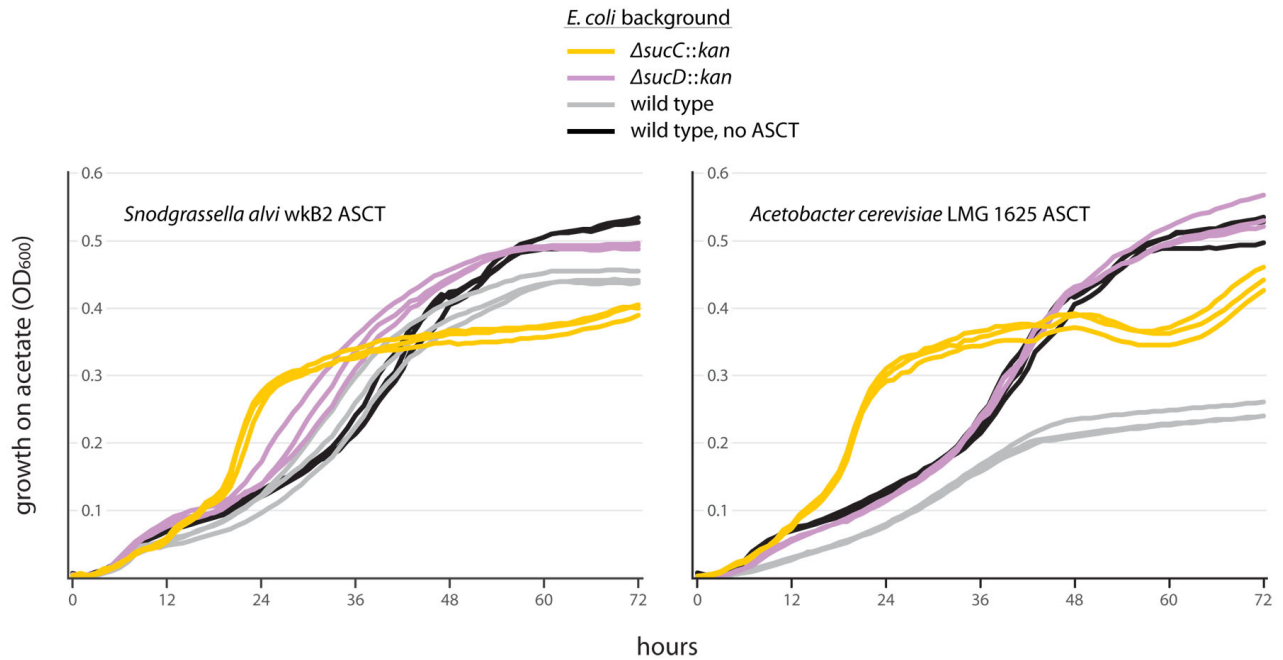

**Supplementary Figure 2.** Rectangular tree representation of *asct* phylogeny in Fig. 1c. Values at nodes indicate bootstrap support from maximum-likelihood analysis (1,000 replicates). Bar, substitutions per site.

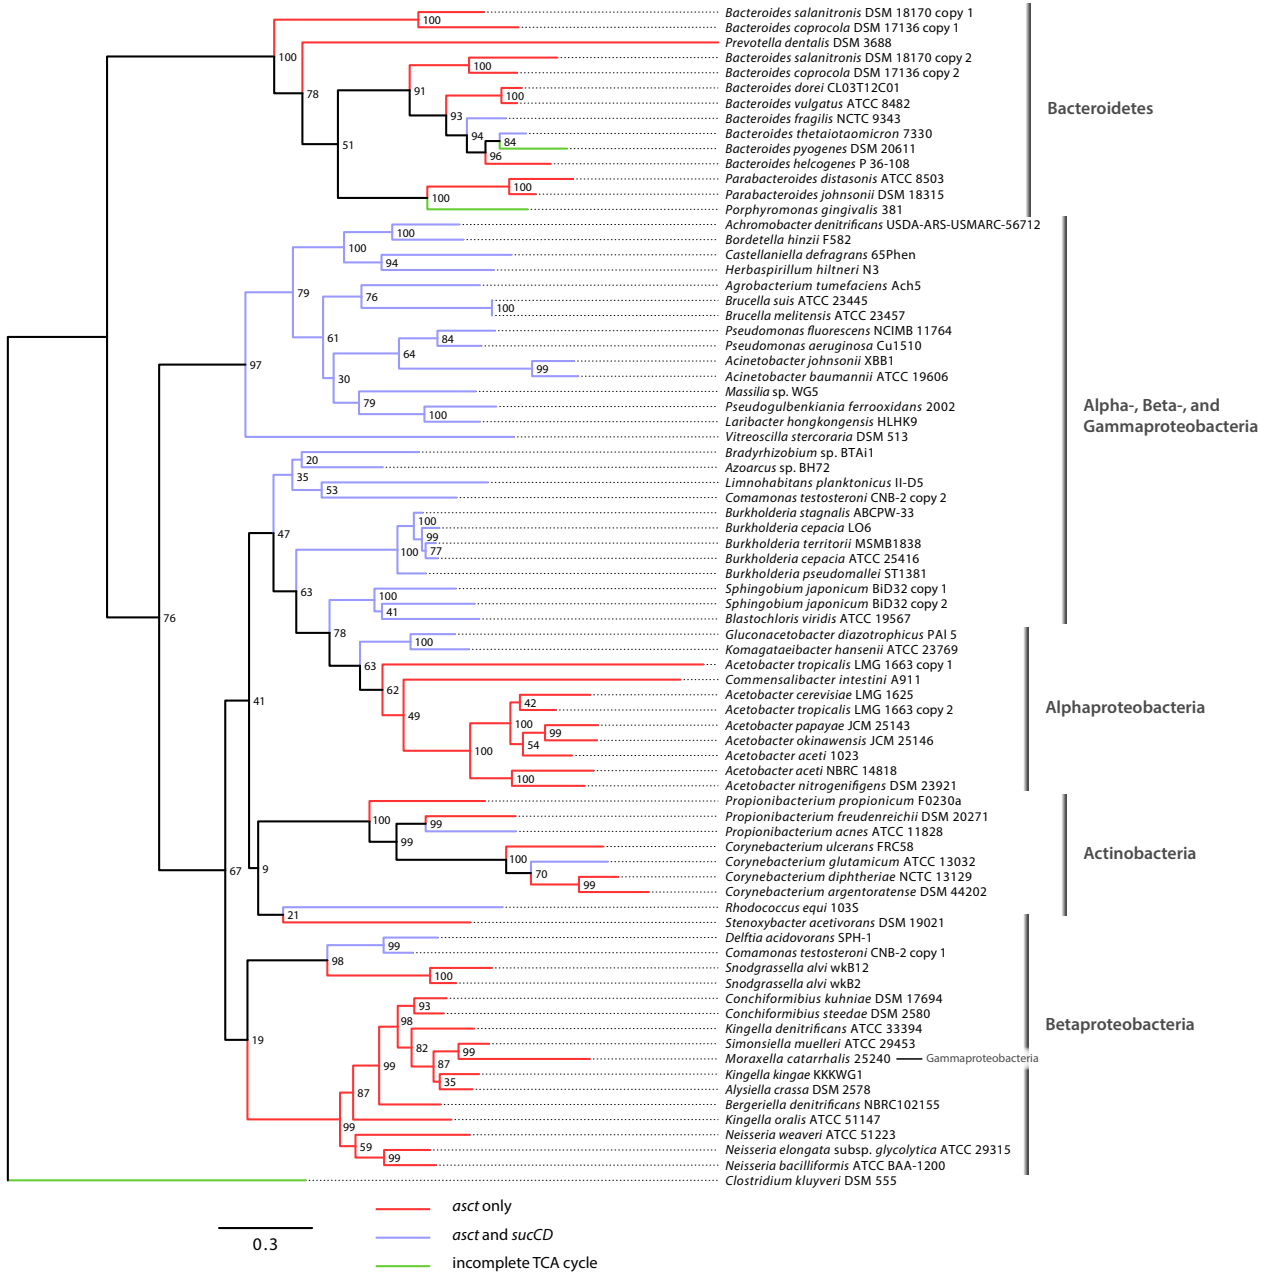

**Supplementary Figure 3.** Prevalence of *asct* in the *Neisseriaceae*. The maximum likelihood algorithm was used to construct a whole genome phylogeny, based on 363 orthologous genes (108,434 amino acid residues). Branches are colored based on presence of *asct* and *sucCD* in tip taxa, and extrapolated using parsimony to interior branches. Circles indicate nodes with 100% bootstrap support (1,000 replicates). Bar, substitutions per site.

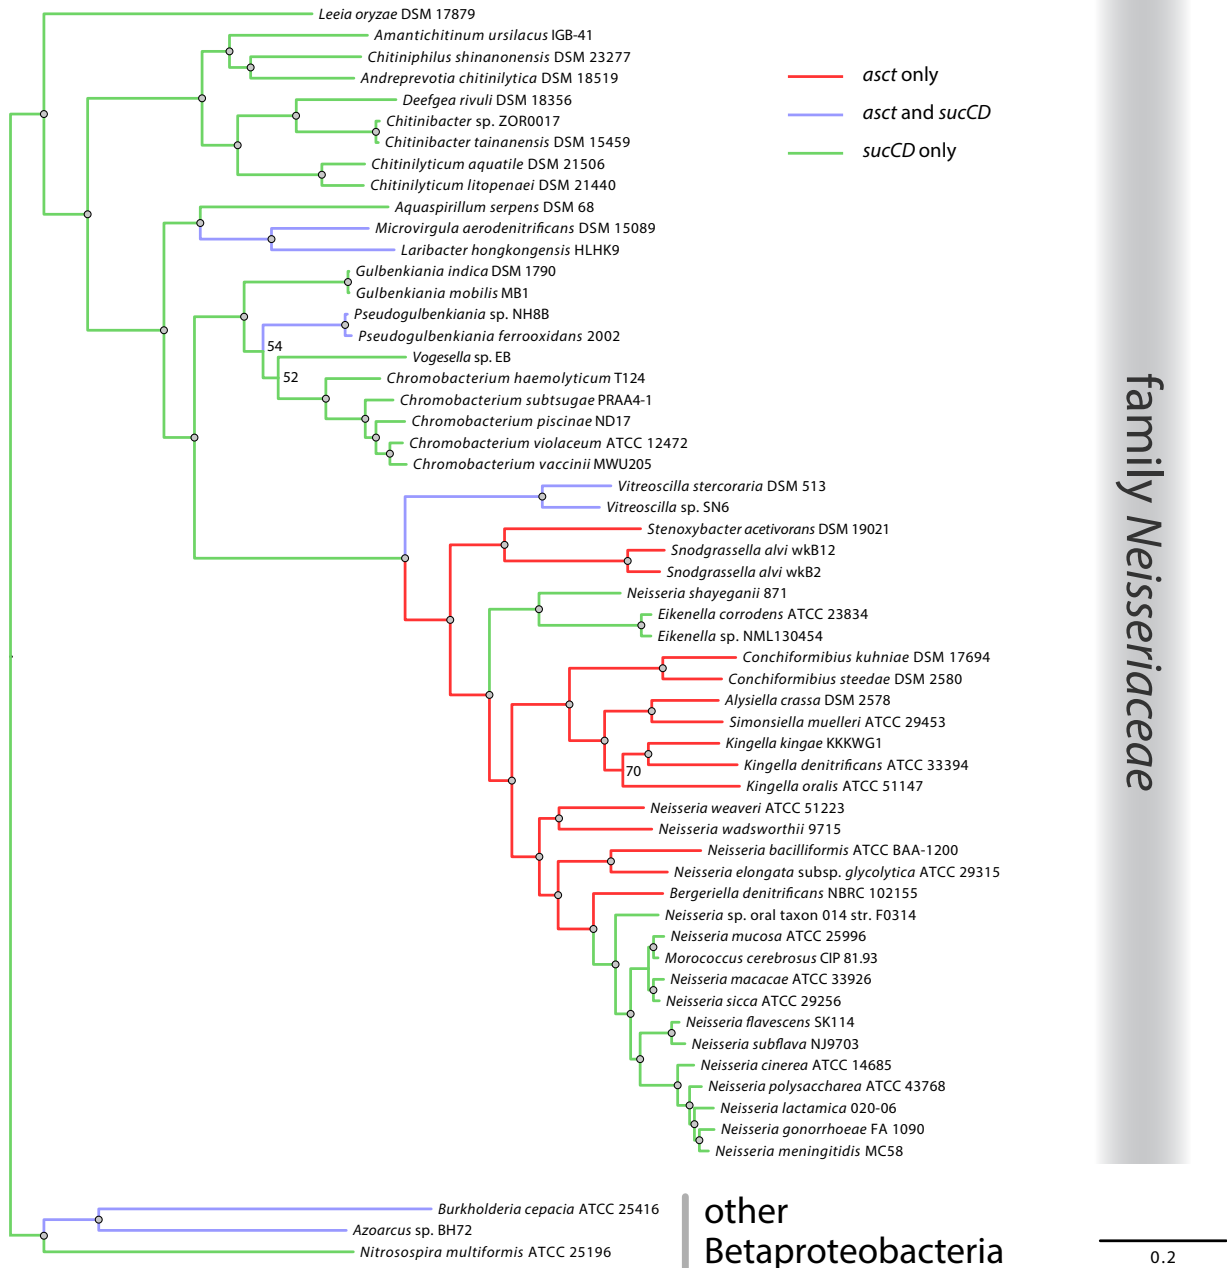

**Supplementary Table 1.** Genes, plasmids, and strains used in this study.

|                           | Description                                                                                                                                                                                                              | Reference       |
|---------------------------|--------------------------------------------------------------------------------------------------------------------------------------------------------------------------------------------------------------------------|-----------------|
| <b>Gene</b>               |                                                                                                                                                                                                                          |                 |
| SALWKB2_RS03080           | <i>asct</i> from <i>Snodgrassella alvi</i> wkB2                                                                                                                                                                          | NZ_CP007446     |
| AD928_RS13430             | <i>asct</i> from <i>Acetobacter cerevisiae</i> LMG 1625                                                                                                                                                                  | NZ_LHZA01000000 |
| DIP_RS20725               | <i>asct</i> from <i>Corynebacterium diphtheriae</i> NCTC 13129                                                                                                                                                           | NC_002935       |
| DR90_RS06235              | <i>asct</i> from <i>Moraxella catarrhalis</i> ATCC 25240                                                                                                                                                                 | NZ_CP008804     |
| F911_00479                | <i>asct</i> from <i>Acinetobacter baumannii</i> ATCC 19606                                                                                                                                                               | NZ_APRG01000000 |
| BF9343_RS00125            | <i>asct</i> from <i>Bacteroides fragilis</i> NCTC 9343                                                                                                                                                                   | NC_003228       |
| <b>Plasmid</b>            |                                                                                                                                                                                                                          |                 |
| pBad-EBFP2 (control)      | pBad backbone, EBFP2 (blue fluorescent protein) insert                                                                                                                                                                   | [15]            |
| pWK1                      | pBad backbone, SALWKB2_RS03080 insert                                                                                                                                                                                    | This study      |
| pWK24                     | pBad backbone, DIP_RS20725 insert                                                                                                                                                                                        | This study      |
| pWK25                     | pBad backbone, AD928_RS13430 insert                                                                                                                                                                                      | This study      |
| pWK29                     | pBad backbone, DR90_RS06235 insert                                                                                                                                                                                       | This study      |
| pWK34                     | pBad backbone, F911_00479 insert                                                                                                                                                                                         | This study      |
| pWK39                     | pBad backbone, BF9343_RS00125 insert                                                                                                                                                                                     | This study      |
| pWK31 (control)           | pBad backbone, F911_00479 insert (reversed)                                                                                                                                                                              | This study      |
| <b>Strain</b>             |                                                                                                                                                                                                                          |                 |
| <i>E. coli</i> CGSC 7636  | F <sup>-</sup> , $\Delta$ ( <i>araD-araB</i> )567, $\Delta$ <i>lacZ</i> 4787(::rrnB-3), $\lambda$ <sup>-</sup> , <i>rph-1</i> , $\Delta$ ( <i>rhaD-rhaB</i> )568, <i>hsdR514</i>                                         | [16]            |
| <i>E. coli</i> CGSC 8788  | F <sup>-</sup> , $\Delta$ ( <i>araD-araB</i> )567, $\Delta$ <i>lacZ</i> 4787(::rrnB-3), $\Delta$ <i>sucC</i> 777:: <i>kan</i> , $\lambda$ <sup>-</sup> , <i>rph-1</i> , $\Delta$ ( <i>rhaD-rhaB</i> )568, <i>hsdR514</i> | [16]            |
| <i>E. coli</i> CGSC 11810 | F <sup>-</sup> , $\Delta$ ( <i>araD-araB</i> )567, $\Delta$ <i>lacZ</i> 4787(::rrnB-3), $\Delta$ <i>sucD</i> 778:: <i>kan</i> , $\lambda$ <sup>-</sup> , <i>rph-1</i> , $\Delta$ ( <i>rhaD-rhaB</i> )568, <i>hsdR514</i> | [16]            |

**Supplementary Table 2.** Growth curve data for Fig. 1b, means and standard deviations. Strain identities as follows: 7636, *E. coli* CGSC 7636; wkE9, pBad-EBFP2 in CGSC 8788; wkE11, pBad-EBFP2 in CGSC 11810; wkE5, pWK1 in CGSC 8788; wkE3, pWK1 in CGSC 11810; wkE17, pWK24 in CGSC8788; wkE15, pWK24 in CGSC 11810; wkE21, pWK25 in CGSC 8788; wkE23, pWK25 in CGSC 11810; wkE27, pWK29 in CGSC 8788; wkE29, pWK29 in CGSC 11810; wkE33, pWK34 in CGSC 8788; wkE34, pWK34 in CGSC 11810; wkE35, pWK39 in CGSC 8788; wkE36, pWK39 in CGSC 11810.

| OD <sub>600</sub> means |         |         |         |         |         |         |         |         |         |         |         |         |         |         |         |
|-------------------------|---------|---------|---------|---------|---------|---------|---------|---------|---------|---------|---------|---------|---------|---------|---------|
| Hour                    | 7636    | wkE9    | wkE11   | wkE5    | wkE3    | wkE17*  | wkE15*  | wkE21   | wkE23   | wkE27   | wkE29   | wkE33   | wkE34   | wkE35   | wkE36   |
| 0                       | 0.00929 | 0.00593 | 0.00759 | 0.00839 | 0.00686 | 0.00831 | 0.00396 | 0.00749 | 0.00589 | 0.00756 | 0.00533 | 0.00678 | 0.01148 | 0.00701 | 0.00511 |
| 1                       | 0.01526 | 0.00973 | 0.01253 | 0.01029 | 0.01126 | 0.01376 | 0.00651 | 0.01209 | 0.00956 | 0.01186 | 0.00819 | 0.01185 | 0.01638 | 0.01148 | 0.00745 |
| 2                       | 0.02206 | 0.01443 | 0.01479 | 0.01179 | 0.01853 | 0.02066 | 0.01081 | 0.01833 | 0.01533 | 0.01359 | 0.01286 | 0.01461 | 0.02441 | 0.01848 | 0.01125 |
| 3                       | 0.02596 | 0.01486 | 0.01436 | 0.01546 | 0.02319 | 0.02376 | 0.01771 | 0.02029 | 0.02086 | 0.01476 | 0.01973 | 0.01618 | 0.03715 | 0.02768 | 0.01721 |
| 4                       | 0.03269 | 0.01449 | 0.01426 | 0.02029 | 0.02709 | 0.02551 | 0.02326 | 0.02356 | 0.02379 | 0.01666 | 0.02649 | 0.02098 | 0.04895 | 0.03171 | 0.02735 |
| 5                       | 0.03979 | 0.01419 | 0.01413 | 0.02629 | 0.03496 | 0.02916 | 0.02711 | 0.02986 | 0.02799 | 0.01826 | 0.02803 | 0.02671 | 0.05891 | 0.03425 | 0.04311 |
| 6                       | 0.04653 | 0.01393 | 0.01406 | 0.03323 | 0.04453 | 0.03366 | 0.03421 | 0.03779 | 0.03346 | 0.02136 | 0.03056 | 0.03355 | 0.06691 | 0.04158 | 0.05438 |
| 7                       | 0.05416 | 0.01359 | 0.01399 | 0.04069 | 0.05349 | 0.04006 | 0.04401 | 0.04459 | 0.03953 | 0.02349 | 0.03399 | 0.03808 | 0.07255 | 0.04945 | 0.06281 |
| 8                       | 0.06083 | 0.01329 | 0.01363 | 0.04973 | 0.06129 | 0.04756 | 0.05406 | 0.05389 | 0.04616 | 0.02679 | 0.03786 | 0.04471 | 0.07648 | 0.05555 | 0.07088 |
| 9                       | 0.06783 | 0.01296 | 0.01333 | 0.06576 | 0.06823 | 0.05256 | 0.06421 | 0.06703 | 0.05413 | 0.03089 | 0.04269 | 0.05341 | 0.08291 | 0.06688 | 0.07848 |
| 10                      | 0.07466 | 0.01276 | 0.01329 | 0.07746 | 0.07466 | 0.06931 | 0.07516 | 0.07999 | 0.06186 | 0.03693 | 0.04783 | 0.06115 | 0.08898 | 0.07688 | 0.08498 |
| 11                      | 0.08176 | 0.01256 | 0.01313 | 0.08609 | 0.07979 | 0.07741 | 0.08346 | 0.08793 | 0.06949 | 0.04456 | 0.05403 | 0.07301 | 0.09225 | 0.09025 | 0.08978 |
| 12                      | 0.08846 | 0.01226 | 0.01303 | 0.09479 | 0.08516 | 0.08586 | 0.09011 | 0.09546 | 0.07693 | 0.05696 | 0.06083 | 0.08091 | 0.09635 | 0.09955 | 0.09475 |
| 13                      | 0.09563 | 0.01219 | 0.01286 | 0.10463 | 0.08973 | 0.09446 | 0.09631 | 0.10249 | 0.08453 | 0.07756 | 0.06869 | 0.09178 | 0.10045 | 0.11001 | 0.09898 |
| 14                      | 0.10296 | 0.01203 | 0.01263 | 0.11426 | 0.09549 | 0.10181 | 0.10506 | 0.11036 | 0.09086 | 0.08659 | 0.07536 | 0.09701 | 0.10435 | 0.11938 | 0.10291 |
| 15                      | 0.11056 | 0.01189 | 0.01249 | 0.12513 | 0.10036 | 0.10921 | 0.10866 | 0.11809 | 0.09573 | 0.09383 | 0.08079 | 0.10385 | 0.11138 | 0.13028 | 0.10595 |
| 16                      | 0.11843 | 0.01186 | 0.01246 | 0.14623 | 0.10653 | 0.11691 | 0.11371 | 0.13146 | 0.10146 | 0.10146 | 0.08646 | 0.11811 | 0.11665 | 0.14668 | 0.10928 |
| 17                      | 0.12503 | 0.01169 | 0.01229 | 0.18089 | 0.11383 | 0.12726 | 0.11931 | 0.15506 | 0.10689 | 0.10939 | 0.09289 | 0.13878 | 0.12338 | 0.17348 | 0.11261 |
| 18                      | 0.13306 | 0.01156 | 0.01223 | 0.21343 | 0.12366 | 0.14196 | 0.12736 | 0.18873 | 0.11309 | 0.11966 | 0.09919 | 0.16695 | 0.13098 | 0.20291 | 0.11738 |
| 19                      | 0.13933 | 0.01153 | 0.01213 | 0.23439 | 0.13006 | 0.16651 | 0.13631 | 0.22149 | 0.11893 | 0.13273 | 0.10583 | 0.20298 | 0.13885 | 0.22918 | 0.12295 |
| 20                      | 0.14619 | 0.01139 | 0.01206 | 0.24639 | 0.13916 | 0.20081 | 0.15011 | 0.24809 | 0.12456 | 0.15223 | 0.11169 | 0.23801 | 0.14641 | 0.24831 | 0.13038 |
| 21                      | 0.15293 | 0.01133 | 0.01199 | 0.25656 | 0.14863 | 0.22846 | 0.16716 | 0.26743 | 0.13073 | 0.17826 | 0.11706 | 0.26305 | 0.15481 | 0.26078 | 0.13965 |
| 22                      | 0.16039 | 0.01119 | 0.01176 | 0.26529 | 0.16013 | 0.24691 | 0.18256 | 0.28323 | 0.13633 | 0.20309 | 0.12329 | 0.28278 | 0.16078 | 0.27158 | 0.14665 |
| 23                      | 0.16743 | 0.01113 | 0.01173 | 0.27066 | 0.17203 | 0.25941 | 0.20121 | 0.29149 | 0.14283 | 0.21859 | 0.12879 | 0.29488 | 0.16675 | 0.27838 | 0.15431 |
| 24                      | 0.17436 | 0.01109 | 0.01166 | 0.27566 | 0.18453 | 0.26726 | 0.21501 | 0.29903 | 0.15009 | 0.22986 | 0.13423 | 0.30271 | 0.18011 | 0.28561 | 0.16441 |
| 25                      | 0.18123 | 0.01109 | 0.01163 | 0.28129 | 0.19423 | 0.27406 | 0.22871 | 0.30749 | 0.15646 | 0.23693 | 0.13913 | 0.31088 | 0.19115 | 0.29128 | 0.17458 |
| Standard deviations     |         |         |         |         |         |         |         |         |         |         |         |         |         |         |         |
| Hour                    | 7636    | wkE9    | wkE11   | wkE5    | wkE3    | wkE17*  | wkE15*  | wkE21   | wkE23   | wkE27   | wkE29   | wkE33   | wkE34   | wkE35   | wkE36   |
| 0                       | 0.00069 | 0.00082 | 0.00005 | 0.00060 | 0.00022 | 0.00075 | 0.00050 | 0.00076 | 0.00057 | 0.00022 | 0.00012 | 0.00255 | 0.00233 | 0.00141 | 0.00025 |
| 1                       | 0.00093 | 0.00127 | 0.00026 | 0.00031 | 0.00037 | 0.00110 | 0.00085 | 0.00087 | 0.00091 | 0.00043 | 0.00024 | 0.00268 | 0.00265 | 0.00190 | 0.00046 |
| 2                       | 0.00114 | 0.00167 | 0.00050 | 0.00038 | 0.00061 | 0.00060 | 0.00135 | 0.00127 | 0.00152 | 0.00019 | 0.00045 | 0.00258 | 0.00345 | 0.00314 | 0.00081 |
| 3                       | 0.00164 | 0.00136 | 0.00057 | 0.00045 | 0.00049 | 0.00070 | 0.00185 | 0.00103 | 0.00151 | 0.00022 | 0.00069 | 0.00255 | 0.00379 | 0.00369 | 0.00128 |
| 4                       | 0.00250 | 0.00126 | 0.00036 | 0.00068 | 0.00121 | 0.00105 | 0.00250 | 0.00135 | 0.00193 | 0.00022 | 0.00074 | 0.00286 | 0.00475 | 0.00331 | 0.00189 |
| 5                       | 0.00215 | 0.00126 | 0.00054 | 0.00131 | 0.00294 | 0.00070 | 0.00245 | 0.00184 | 0.00285 | 0.00029 | 0.00070 | 0.00298 | 0.00678 | 0.00375 | 0.00282 |
| 6                       | 0.00209 | 0.00108 | 0.00043 | 0.00153 | 0.00419 | 0.00090 | 0.00205 | 0.00246 | 0.00402 | 0.00059 | 0.00094 | 0.00284 | 0.00777 | 0.00636 | 0.00332 |
| 7                       | 0.00259 | 0.00111 | 0.00040 | 0.00019 | 0.00464 | 0.00120 | 0.00075 | 0.00100 | 0.00586 | 0.00040 | 0.00109 | 0.00294 | 0.00891 | 0.00735 | 0.00696 |
| 8                       | 0.00287 | 0.00111 | 0.00045 | 0.00183 | 0.00421 | 0.00100 | 0.00110 | 0.00275 | 0.00716 | 0.00049 | 0.00128 | 0.00335 | 0.00887 | 0.00512 | 0.01048 |
| 9                       | 0.00295 | 0.00099 | 0.00033 | 0.00045 | 0.00372 | 0.00200 | 0.00345 | 0.00106 | 0.00822 | 0.00045 | 0.00148 | 0.00360 | 0.00962 | 0.00590 | 0.01416 |
| 10                      | 0.00287 | 0.00099 | 0.00042 | 0.00202 | 0.00291 | 0.00275 | 0.00600 | 0.00182 | 0.00866 | 0.00103 | 0.00186 | 0.00433 | 0.01025 | 0.00548 | 0.01660 |
| 11                      | 0.00276 | 0.00085 | 0.00029 | 0.00249 | 0.00223 | 0.00425 | 0.00740 | 0.00140 | 0.00876 | 0.00120 | 0.00224 | 0.00475 | 0.00951 | 0.00351 | 0.01692 |
| 12                      | 0.00263 | 0.00085 | 0.00025 | 0.00366 | 0.00143 | 0.00400 | 0.00705 | 0.00144 | 0.00792 | 0.00057 | 0.00257 | 0.00594 | 0.00886 | 0.00513 | 0.01607 |
| 13                      | 0.00225 | 0.00083 | 0.00029 | 0.00540 | 0.00110 | 0.00510 | 0.00645 | 0.00156 | 0.00777 | 0.00188 | 0.00252 | 0.00661 | 0.00796 | 0.00680 | 0.01588 |
| 14                      | 0.00170 | 0.00087 | 0.00033 | 0.00711 | 0.00171 | 0.00625 | 0.00500 | 0.00075 | 0.00742 | 0.00304 | 0.00304 | 0.00791 | 0.00695 | 0.00774 | 0.01434 |
| 15                      | 0.00227 | 0.00090 | 0.00037 | 0.00921 | 0.00159 | 0.00785 | 0.00410 | 0.00074 | 0.00675 | 0.00363 | 0.00192 | 0.00992 | 0.00727 | 0.00906 | 0.01377 |
| 16                      | 0.00179 | 0.00085 | 0.00033 | 0.01270 | 0.00208 | 0.00865 | 0.00405 | 0.00016 | 0.00685 | 0.00448 | 0.00279 | 0.01147 | 0.00689 | 0.00829 | 0.01298 |
| 17                      | 0.00195 | 0.00083 | 0.00029 | 0.01656 | 0.00275 | 0.01110 | 0.00475 | 0.00176 | 0.00672 | 0.00550 | 0.00288 | 0.01403 | 0.00652 | 0.00812 | 0.01257 |
| 18                      | 0.00156 | 0.00085 | 0.00033 | 0.01795 | 0.00503 | 0.01250 | 0.00520 | 0.00335 | 0.00660 | 0.00719 | 0.00288 | 0.01656 | 0.00644 | 0.00656 | 0.01303 |
| 19                      | 0.00116 | 0.00080 | 0.00033 | 0.01832 | 0.00553 | 0.01315 | 0.00595 | 0.00454 | 0.00706 | 0.00852 | 0.00278 | 0.01645 | 0.00763 | 0.00687 | 0.01350 |
| 20                      | 0.00083 | 0.00083 | 0.00033 | 0.01707 | 0.00771 | 0.01245 | 0.00415 | 0.00336 | 0.00718 | 0.01072 | 0.00309 | 0.01470 | 0.00890 | 0.00785 | 0.01570 |
| 21                      | 0.00068 | 0.00080 | 0.00034 | 0.01622 | 0.00891 | 0.01120 | 0.00930 | 0.00090 | 0.00716 | 0.01136 | 0.00269 | 0.01292 | 0.00924 | 0.00978 | 0.01972 |
| 22                      | 0.00137 | 0.00075 | 0.00033 | 0.01622 | 0.01144 | 0.01025 | 0.01480 | 0.00392 | 0.00741 | 0.01090 | 0.00217 | 0.01238 | 0.00899 | 0.01001 | 0.02102 |
| 23                      | 0.00163 | 0.00080 | 0.00017 | 0.01609 | 0.01326 | 0.01075 | 0.01765 | 0.00148 | 0.00815 | 0.01211 | 0.00259 | 0.01353 | 0.01075 | 0.01048 | 0.02220 |
| 24                      | 0.00203 | 0.00075 | 0.00022 | 0.01474 | 0.01594 | 0.01030 | 0.01365 | 0.00252 | 0.00894 | 0.01254 | 0.00250 | 0.01383 | 0.01508 | 0.01184 | 0.02619 |
| 25                      | 0.00231 | 0.00075 | 0.00012 | 0.01633 | 0.01849 | 0.01000 | 0.01195 | 0.00423 | 0.00958 | 0.01263 | 0.00224 | 0.01400 | 0.01698 | 0.01109 | 0.02944 |

\* n = 3 for each strain, except wkE17 and wkE15, where n = 2.
